# Supplementary material
Source: PubMed Central journal article supplement (PMC1211510)
Supplement: jvirol_79_19_12425__1.pdf [file jvirol_79_19_12425__1.pdf]

*Supplemental Material*1 **Supplemental Table 1: Published CD4+ T cell epitopes within NS3-NS4a-NS4b**

| aa position | sequence                                       | HLA-restriction                                                            | source   |            |
|-------------|------------------------------------------------|----------------------------------------------------------------------------|----------|------------|
| 1201-1220   | LETTMRSPVFTDNSSPPVVP                           | DR11                                                                       | line     | ref. 2     |
| 1207-1226   | SPVFTDNSSPPVVPQSFQVA                           | DRB1*1104 / *1502                                                          | PBMC     | this paper |
| 1248-1261   | GYK <b><u>VLVLNPSVAA</u></b> T                 | <b>DRB1*1101,*0401,*1201,*1302,*1601</b>                                   | clone    | ref. 3     |
| 1241-1260   | PAAYAAQGYKVLVLNPSVAA                           | <u>DR11/DQ3</u> + <u>DR4/10,DQ1/3</u>                                      | clone    | ref. 2     |
| 1248-1261   | GYKVLVLNPSVAA <b>T</b> L                       | <b>DRB1*0401</b>                                                           | tetramer | ref. 2     |
| 1247-1262   | QGYKVLVLNPSVAA                                 | DR3 / <u>DR11</u>                                                          | PBMC     | ref. 19    |
| 1248-1267   | GYKVLVLNPSVAA <b>T</b> LGFGAY                  | <b>DQB1*0301</b>                                                           | line     | ref. 11    |
| 1248-1267   | GYKVLVLNPSVAA <b>T</b> LGFGAY                  |                                                                            | line     | ref. 15    |
| 1281-1300   | GVRTITTTGSPITYSTYGKFL                          | DR4 / DR8                                                                  | line     | ref. 2     |
| 1280-1299   | TGVRTITTTGSPITYSTYGK <b>F</b>                  |                                                                            | PBMC     | this paper |
| 1291-1310   | ITYSTYGKFLADGGCSGGAY                           | DR4 / DR10                                                                 | line     | ref. 2     |
| 1295-1310   | TYGKFLADGGCSGGAY                               | DR3 / 11                                                                   | PBMC     | ref. 19    |
| 1289-1308   | SPITYSTYGKFLADGGCAGG                           |                                                                            | PBMC     | this paper |
| 1321-1340   | TDATSILGIGTVLDQAETAG                           | DR4 / DR8                                                                  | line     | ref. 2     |
| 1323-1338   | ATSILGIGTVLDQAET                               | DR3 / DR4                                                                  | PBMC     | ref. 19    |
| 1325-1344   | SILGIGTVLDQGETAGAKLV                           |                                                                            | PBMC     | this paper |
| 1388-1407   | <b>GRHLIFCHSKK</b> KCDELATKL                   | <b>DRB1*1501/DRB5*0501</b>                                                 | clone    | this paper |
| 1384-1401   | VIKGRHLIFCHSKK <b>K</b> CD                     | <b>DRB1*1501/DRB5*0501</b>                                                 | clone    | ref. 5     |
| 1387-1402   | GGRHLIFCHSKK <b>K</b> C                        | DR1/ <u>15</u> + DR8/ <u>15</u> + DR1/ <u>15</u> + DR <u>15</u> / <u>7</u> | PBMC     | ref. 19    |
| 1416-1425   | <b>AYYRGLDVS</b> V                             | <b>DRB1*1501</b>                                                           | clone    | this paper |
| 1411-1430   | GINAVAYYRGLDVS <b>VI</b> PTSG                  | DR4 / 10                                                                   | line     | ref. 2     |
| 1411-1426   | GINAVAYYRGLDVS <b>VI</b>                       | DR1 / <u>DR15</u>                                                          | PBMC     | ref. 19    |
| 1415-1430   | VAYYRGLDVS <b>VI</b> PTSG                      | DR8 / <u>DR15</u>                                                          | PBMC     | ref. 19    |
| 1450-1469   | SVIDCNTCVTQTVDFSLDPT                           | <b>DRB1*1302</b>                                                           | clone    | ref. 3     |
| 1447-1464   | DFDSVIDCNTCVTQTVDF                             |                                                                            |          | ref. 5     |
| 1454-1471   | CNTCVTQTVDFSLDPT <b>FT</b>                     |                                                                            |          | ref. 5     |
| 1521-1530   | YDAGCAWYELTPAETT <b>V</b> RLR                  | DR4 / 10                                                                   | line     | ref. 2     |
| 1525-1534   | CAWYELTPAETT <b>V</b> RLRAYMN                  |                                                                            | PBMC     | this paper |
| 1535-1554   | TT <b>V</b> RL <b>RAYMNT</b> <b>PGLPV</b> CQDH | <b>DRB1*0701</b>                                                           | clone    | this paper |
| 1531-1550   | TPAETT <b>V</b> RLRAYMNT <b>PGLPV</b>          | DR4 / 8                                                                    | line     | ref. 2     |
| 1539-1554   | L <b>RAYMNT</b> <b>PGLPVC</b> QDH              | DR1 / DR15                                                                 | PBMC     | ref. 19    |
| 1585-1604   | <b>YLVA</b> <b>YQATV</b> CARAQAPPSW            | <b>DRB1*1501</b>                                                           | clone    | this paper |
| 1579-1597   | SGENLPYLVA <b>YQATV</b> CARA                   | <b>DRB1*0401</b>                                                           | tetramer | ref. 2     |
| 1581-1600   | ENLPYLVA <b>YQATV</b> CARAQAP                  | <u>DR4 / 10</u> , <u>DR4 / 8</u>                                           | line     | ref. 2     |
| 1601-1620   | PPSWDQMWKCLIRL <b>KPT</b> LHG                  | DR4 / 8                                                                    | line     | ref. 2     |
| 1597-1612   | AQAPPSWDQMWK <b>CL</b> I                       | DR8 / 15                                                                   | PBMC     | ref. 19    |
| 1595-1614   | ARAQAPPSWDQMWK <b>CL</b> IRL                   |                                                                            | PBMC     | this paper |
| 1617-1636   | TLHGPTPLLYRLGAVQ <b>NE</b> IT                  |                                                                            | line     | ref. 15    |
| 1617-1636   | TLHGPTPLLYRLGAVQ <b>NE</b> IT                  | DRB1*0407/*1104,<br>DRB1*0801                                              | line     | ref. 11    |
| 1621-1640   | PTPLLYRLGAVQ <b>NE</b> ITL <b>TH</b> P         | DR4 / 10                                                                   | line     | ref. 2     |
| 1615-1644   | KPTLHGPTPLLYRLGAVQ <b>NE</b>                   |                                                                            | PBMC     | this paper |

*Supplemental Material*

|           |                                 |                             |          |            |
|-----------|---------------------------------|-----------------------------|----------|------------|
| 1625-1654 | LYRLGAVQNEITLTHPVTKY            |                             | PBMC     | this paper |
| 1655-1674 | VVTST <b>TWLVGGVLA</b> AALAAAYC | DR1 / 13                    | clone    | this paper |
| 1671-1690 | AAYCLSTGCVVIVGRVVLSG            | DR11/DQ3                    | clone    | ref. 2     |
| 1677-1696 | TGCVVIVGRVVLSGKPAIIPD           |                             |          | ref. 15    |
| 1677-1696 | TGCVVIVGRVVLSGKPAIIPD           | DRB1*0407/* <u>1104</u>     | line     | ref. 11    |
| 1675-1694 | LSTGCVVIVGRVVLSGKPAI            |                             | PBMC     | this paper |
| 1685-1704 | RVVLS <b>GKPAIIPDREVLYRE</b>    | <b>DRB1*0301</b>            | clone    | this paper |
| 1686-1705 | VVLSGKPAIIPDREVLYREF            | <b>DRB1*0301</b>            | line     | ref. 9     |
| 1687-1706 | VLSGKPAIIPDREVLYREFD            | DRB1*1109/* <u>0305</u>     | line     | ref. 11    |
| 1687-1708 | VLSGKPAIIPDREVLYREFD            |                             | line     | ref. 15    |
| 1746-1765 | IAPAVQTNWQKLETFWAKHM            | DR16 / 3                    | line     | ref. 9     |
| 1747-1766 | APAVQTNWQKLETFWAKHMW            | DRB1*0801                   | line     | ref. 11    |
| 1745-1764 | VIAPAVQTNWQKLETFWAKH            |                             | PBMC     | this paper |
| 1765-1784 | MWNFISGI <b>QYLAGLSTLPGN</b>    | <b>DRB1*1101</b>            | clone    | this paper |
| 1767-1786 | NFISGIQYLAGLSTLPGNPA            | DRB1* <u>1104</u>           | line     | ref. 11    |
| 1770-1790 | SGIQYLAGLSTLPGNPAIASL           | <b>DRB1*0401</b>            | tetramer | ref. 2     |
| 1771-1790 | GIQYLAGLSTLPGNPAIASL            | <b>DR11, DR4 / 8</b>        | clone    | ref. 2     |
| 1785-1804 | PA <b>IASLMAFTA</b> AVTSPLTTS   | <b>DRB1*0102, DRB1*0101</b> |          | this paper |
| 1777-1796 | AGLSTLPGNPAIASLMAFTA            |                             | line     | ref. 15    |
| 1787-1806 | IASLMAFTAAVTSPLTTSQT            |                             | line     | ref. 15    |
| 1777-1796 | AGLSTLPGNPAIASLMAFTA            | DRB1*0801                   | line     | ref. 11    |
| 1781-1800 | LPGNPAIASLMAFTAAVTSP            | DR4 / 10                    | line     | ref. 2     |
| 1805-1824 | QTLL <b>LFNILGGWVA</b> AQLAAPG  | <b>DRB1*0101, DRB1*0102</b> | clone    | this paper |
| 1801-1820 | LTTSQTLLFNILGGWVAAQL            | DR4 / 10                    | line     | ref. 2     |
| 1807-1826 | LLFNILGGWVAAQLAAPGAA            |                             | line     | ref. 15    |
| 1797-1816 | VTSPLTTSQTLLFNILGGWV            |                             | line     | ref. 15    |
| 1807-1826 | LLFNILGGWVAAQLAAPGAA            |                             | line     | ref. 11    |
| 1817-1836 | AAQLAAPGAATAFVGAGLAG            | DRB1*0407/*1104             | line     | ref. 11    |
| 1875-1894 | <b>STEDLVNLLPAILSPGALVV</b>     | <b>DRB1*0101</b>            | clone    | this paper |
| 1871-1890 | GEVPSTEDLVNLLPAILSPG            | DR4 / 10                    | line     | ref. 2     |
| 1877-1896 | EDLVNLLPAILSPGALVVGV            | DRB1*0801                   | line     | ref. 11    |
| 1891-1910 | ALVVGVVCAAILRRHVGPE             | DR11                        | line     | ref. 2     |
| 1907-1926 | GPGEQVQWMNRLIAFASRG             | <b>DRB1*1104</b>            | line     | ref. 11    |
| 1909-1929 | GEGAVQWMNRLIAFASRGNHV           | <b>DRB1*1104</b>            | line     | ref. 11    |
| 1911-1930 | GAVQWMNRLIAFASRGNHVS            | DR11, DR4 / 10              | clone    | ref. 2     |
| 1905-1924 | HVGPGEQVQWMNRLIAFAS             |                             | PBMC     | this paper |
| 1977-1996 | DIWDWICEVLSDFKTWLKAKL           | DRB1*1109/*0305             | line     | ref. 11    |

**1 Supplemental Table 2: HLA-DRB1\* amplification and sequencing primers****2 HLA-DRB1\* amplification primers**

3 Sense primer: DRB1-groupspecific primers (3,3 pmol/μl):

4 DRB1-01 GFP NEW; DRB1-04 GFP NEW; DRB1-07novel; DRB1-09 GFP NEW; DRB1-10  
5 GFP NEW; DRB1-15 GFP NEW (DRB1\*15;16); DRAA (DRB1\*03; 08; 11; 12; 13; 14)

6 Reverse primer: DRB1-Space-91GFP (5 pmol/μl)

7 DRB1-01 GFP NEW; GCC ACC ATG GTG AGC AAG GAT ATA TGC ACG TTT CTT

8 **GTG GCA GCT TAA GTT**

9 DRB1-04GFPNEW; GCC ACC ATG GTG AGC AAG GAT ATA TGC ACG TTT CTT GGA

10 **GCA GGT TAA AC**

11 DRB1-07GFPnovel; GCC ACC ATG GTG AGC AAG GAT ATA TTC ACG TTT CCT GTG

12 **GCA GGG**

13 DRB1-09 GFPNEW; GCC ACC ATG GTG AGC AAG GAT ATC AGC

14 **ACG TTT CTT GAA GCA GGA TAA GTT**

15 DRB1-15GFPNEW; GCC ACC ATG GTG AGC AAG GAT ATA TTC ACG TTT CCT GTG

16 **GCA GCC TAA GA**

17 DRB1-AA; GCC ACC ATG GTG AGC AAG GCC CAC AGC ACG TTT

18 **CTT GGA GTA CT**

19 DRB1-rev (space); GCT GAT TAT GAT CAA GAG TCGat tat aat aat tat aat

20 aaGCTYACCTCGCCKCTGCA

**21 HLA-DRB1\* sequencing primers**

22 GFP-hin; 5'-GCC ACC ATG GTG AGC AAG G-3'

23 GFP back; 5'-GCT GAT TAT GAT CAA GA GTC G-3'

**Supplemental Material**

1 The amplification of HLA-DRB1\* exon 2 was done in 50  $\mu$ l PCR reaction mixes using 10  $\mu$ l  
2 genomic DNA (about 300 ng) as template and Applied Biosystems (Applied Biosystems, (AB),  
3 Darmstadt, Germany) chemicals ( 0,25  $\mu$ l (1,25 units) of Ampli Taq polymerase, 5  $\mu$ l buffer I, 4  
4  $\mu$ l dNTPs (10 mM; Amersham Bioscience, Little Chalfont Buckhamshire, England), 1  $\mu$ l of each  
5 groupspecific amplification primer, 1  $\mu$ l of DRB1 reverse primer and 29,5  $\mu$ l of water. The PCR  
6 was performed in a T3 thermocycler (Biometra; Göttingen, Germany) following the cycler  
7 profile: 10 s at 95°C; 15 x | 95°C 10 s, 60°C 10 s, 72°C 1 min|; 10 x | 95°C 10 s, 60°C 10 s, 72°C  
8 45 s|; 25 x | 95°C 10 s, 60°C 10 s, 72°C 25 s|; 5 min 72 °C and cool down to 4°C.

9 Amplification control was done by loading 7  $\mu$ l of the appropriate PCR sample mixed with 3  $\mu$ l  
10 of an adequate loading buffer on an ethidium bromide stained 1.5% agarose gel. UV-light  
11 detection after electrophoresis revealed an amplification product of the correct size.

12 Removal of the amplification primers was done using the QIAquick PCR Purification Kit  
13 (Qiagen, Hilden, Germany) and elution in 50  $\mu$ l water from the columns.

14 The cycle sequencing reactions were performed using 5  $\mu$ l purified PCR product, 1  $\mu$ l sequencing  
15 primer (10 pmol/ $\mu$ l), 0.75  $\mu$ l BigDye Terminator v3.0 Ready Reaction mix (AB), 1.25  $\mu$ l PCR  
16 Buffer (AB) and 2  $\mu$ l Q-solution. Sequencing was performed in both directions using the  
17 sequencing primers GFPhin and GFPback (Suppl. Table 2). The PCR follows the profile: 1 min  
18 at 96°C; 35 x |96°C 20 s, 60°C 4 min|; cool down to 4°C.

19 After cycle sequencing excess of dye-labeled dideoxynucleotides was removed by ethanol  
20 precipitation (30  $\mu$ l blue dextran (Sigma) solution (10 ng / ml), 100  $\mu$ l acetate/ethanol (stock: 1  
21 ml 3M Na-acetate pH 4,8 solution (AB) in 50 ml of absolute ethanol (Merck, Schwalbach,  
22 Germany). The ethanol precipitation was done in an Eppendorf centrifuge 5417C in an 8-strip  
23 rotor (F45-48 PCR, Eppendorf, Wesseling-Berzdorf, Germany) for 10 min at 3500 g (ref). The

***Supplemental Material***

1 liquid was discarded and the resulting blue-coloured DNA pellet was washed with 80% ethanol,  
2 dried, and resolved in 14 µl Hi-Di formamide (AB).

3 DNA sequencing was carried out using a 3100 Genetic Analyzer (AB) with a 50 cm array using  
4 standard run module conditions except 25 s injection time and 4000 s run time. The sequencing  
5 files were converted to Macintosh format and exon 2 sequences were analysed using MT  
6 Navigator PCC (AB) and SCORE software (Qiagen, Vienna, Austria).

7

**Supplemental Material****Suppl. Table 3: Intergenotypic variability of immunodominant CD4+ T cell epitopes**

| gt | p22                  |      | p24               |      | p37              |      | p42         |      |
|----|----------------------|------|-------------------|------|------------------|------|-------------|------|
|    | 1388                 | 1401 | 1415              | 1425 | 1540             | 1550 | 1585        | 1595 |
| 1b | GRHLIFCHSKKKCD..//.. |      | VAYYRGLDVSV..//.. |      | RAYLNTPLPV..//.. |      | YLVAYQATVCA |      |
| 1a | -----                |      | -----             |      | ---M-----        |      | -----       |      |
| 1c | -----                |      | --F-----          |      | -----            |      | -----       |      |
| 2a | -----                |      | -----             |      | ---F-----        |      | --T-----    |      |
| 2b | -----                |      | -----             |      | ---F-----        |      | --T-----    |      |
| 3a | -----                |      | -----             |      | ---LS-----       |      | --T-----    |      |
| 4  | -----                |      | -----             |      | K--FD-----       |      | -----S-     |      |

| gt | p49              |      | p52                    |      | p60               |      | p62        |      |
|----|------------------|------|------------------------|------|-------------------|------|------------|------|
|    | 1659             | 1668 | 1690                   | 1704 | 1773              | 1783 | 1787       | 1796 |
| 1b | TWVLVGGVLA..//.. |      | GKPAIIPDREVLVYRE..//.. |      | QYLAGLSTPLG..//.. |      | IASLMAFTAS |      |
| 1a | -----            |      | -----                  |      | -----             |      | -----A     |      |
| 1c | -----            |      | ----V-----             |      | -----             |      | ----S---A  |      |
| 2a | ----A-----       |      | QRAVVA--K---EA         |      | -----             |      | A-M---S-A  |      |
| 2b | ----A-----       |      | DQVVVA--K-I--EA        |      | -----             |      | A-M---S-A  |      |
| 3a | ----L-----       |      | ----LV--K---QQ         |      | -----             |      | V-----     |      |
| 4  | -----            |      | -Q--V-----QQ           |      | -----             |      | -----A     |      |

| gt | p64              |      | p71        |      |
|----|------------------|------|------------|------|
|    | 1808             | 1817 | 1879       | 1889 |
| 1b | LFNILGGWVA..//.. |      | LVNLLPAILS |      |
| 1a | -----            |      | -----      |      |
| 1c | -----            |      | -----      |      |
| 2a | -L-----L-        |      | V-----G--- |      |
| 2b | -L--M---L-       |      | V-----     |      |
| 3a | F-----           |      | M-----     |      |
| 4  | -----            |      | -----      |      |

*Supplemental Material*1 **Suppl. Table 4\*: Intragenotypic variability of immunodominant CD4+ T cell epitopes**  
2

| No  | AS        | most frequent sequence variant in a given genotype (%) |               |              |              |             |
|-----|-----------|--------------------------------------------------------|---------------|--------------|--------------|-------------|
|     |           | 1a<br>(n=20)                                           | 1b<br>(n=150) | 2a<br>(n=10) | 2b<br>(n=18) | 3a<br>(n=4) |
| p22 | 1388-1407 | 100                                                    | 94.7          | 100          | 83.3         | 100         |
| p24 | 1415-1425 | 100                                                    | 95.3          | 77.8         | 94.4         | 100         |
| p37 | 1540-1550 | 100                                                    | 97.3          | 88.9         | 100          | 100         |
| p42 | 1585-1595 | 100                                                    | 96.0          | 66.7         | 100          | 100         |
| p49 | 1659-1668 | 100                                                    | 98.7          | 100          | 61.1         | 100         |
| p52 | 1690-1704 | 50                                                     | 16.6          | 100          | 22.2         | 100         |
| p60 | 1773-1783 | 100                                                    | 99.3          | 77.8         | 100          | 75.0        |
| p62 | 1787-1796 | 100                                                    | 98.6          | 100          | 100          | 100         |
| p64 | 1808-1817 | 100                                                    | 96.7          | 77.8         | 100          | 100         |
| p71 | 1879-1889 | 94.1                                                   | 89.3          | 88.9         | 88.9         | 75.0        |

3

4 \* derived from the <http://hcvpub.ibcp.fr>
